# Supplementary material
Source: Research Square preprint supplement (doi:10.21203/rs.3.rs-9819674/v1)
Supplement: Supplementary file 1 [file 67a18d0f30e2bf49a22696b2.docx]

## Supplementary figures and tables

The following items should be supplied as Supplementary Figures

**Fig. S1, pre-fertilisation sensitivity analysis excluding Karabinus 2014**


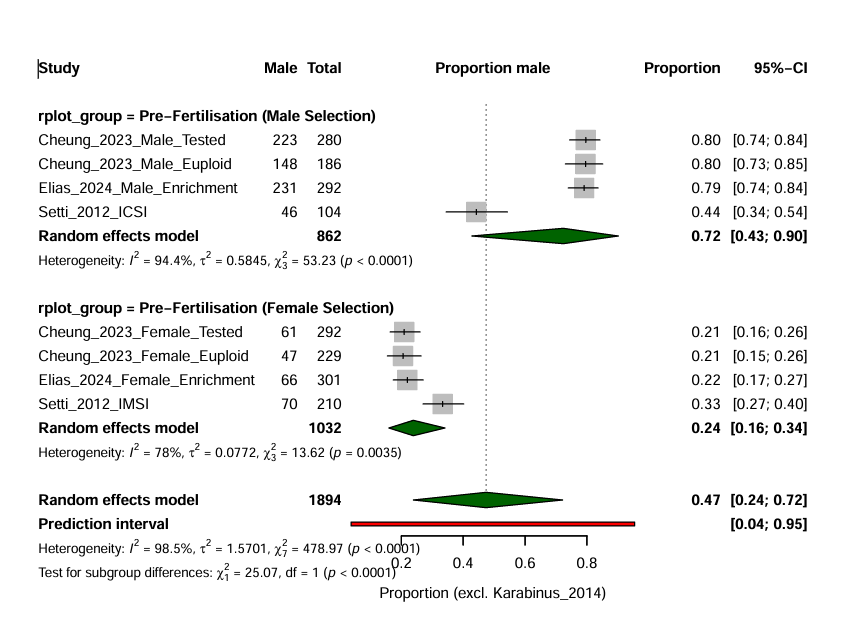


**Fig. S2, blastulation-day comparison**


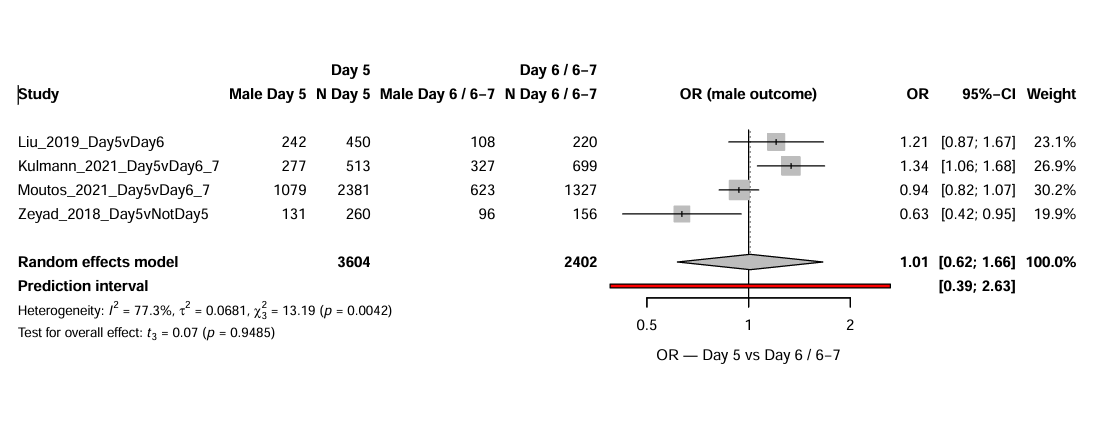


**Fig. S3, TE-grade comparison**


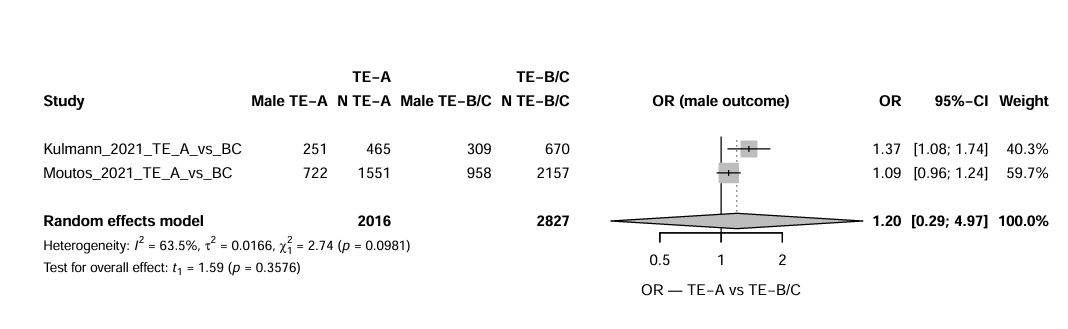


**Fig. S4, ICM-grade comparison**


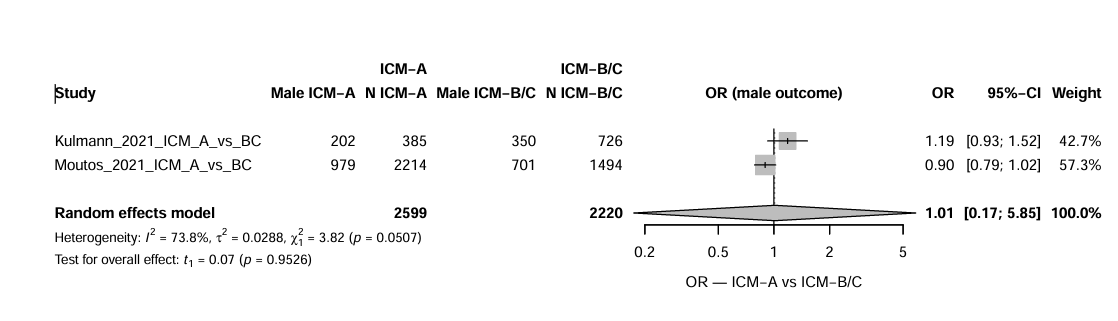


**Fig. S5, fertilisation-method comparison**


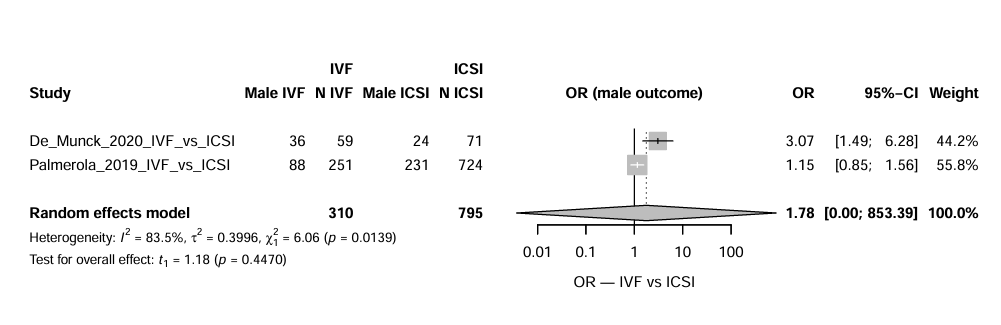


**Fig. S6, primary contour-enhanced funnel plot**

**
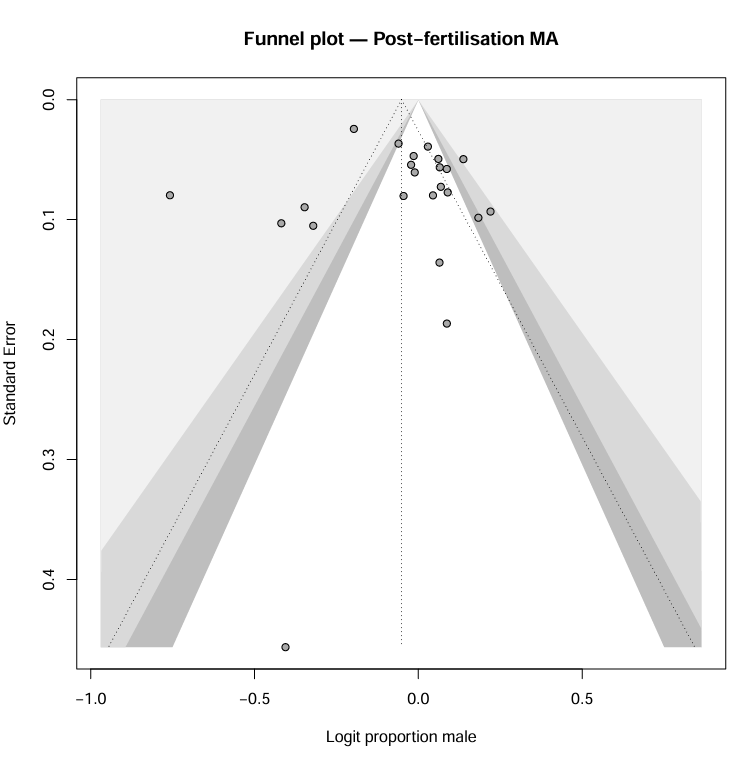
**

**Fig. S7, primary sensitivity analysis**

**
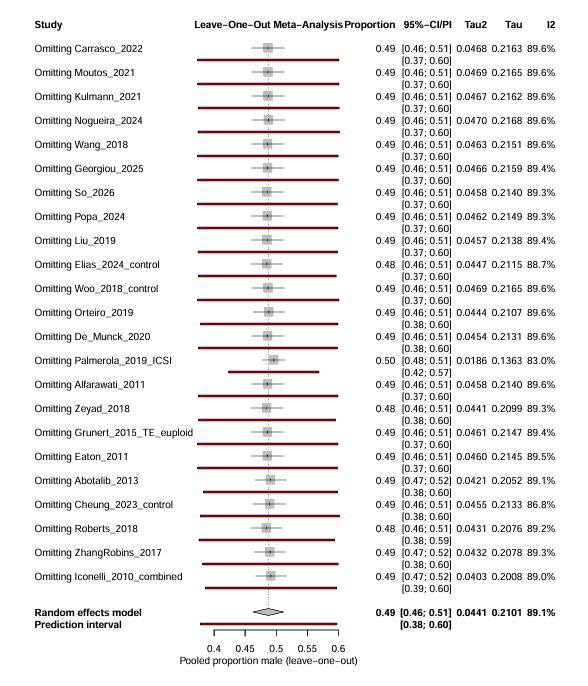
**

**Fig. S8, secondary contour-enhanced funnel plot**

**
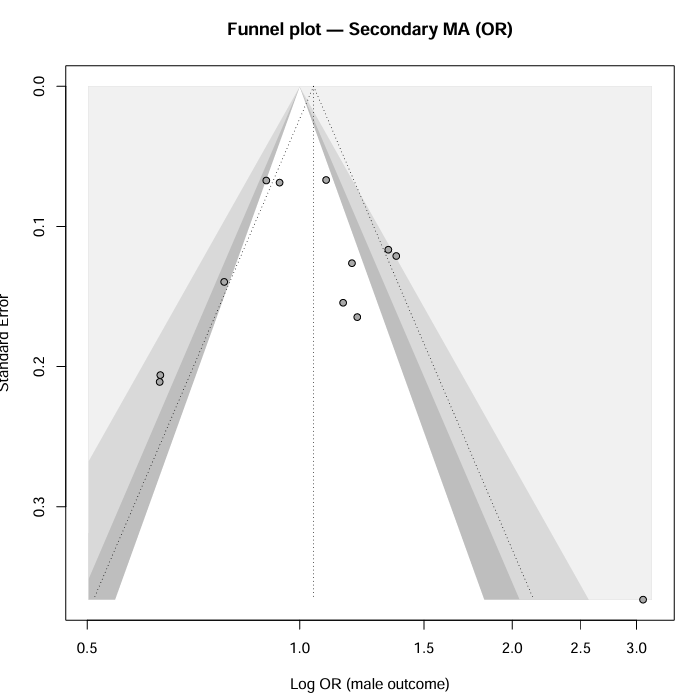
**

**Fig. S9, secondary sensitivity analysis**

**
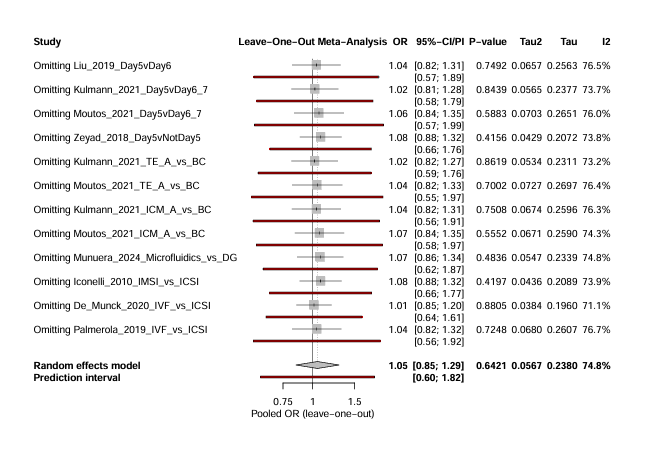
**
