# Supplementary material
Source: Research Square preprint supplement (doi:10.21203/rs.3.rs-9819674/v1)
Supplement: Supplementary file 2 [file d58ab50ff75d67e8d1853209.docx]

**Dynamics of Embryo Sex Ratio in IVF/ICSI: A Systematic Review and Meta-Analysis of Genetically Confirmed Embryos**

**Supplementary File — Complete Search Strategies and Boolean Operator Combinations**

Authors removed for double-anonymous review | PROSPERO: CRD420261354601 | Target journal: J Assist Reprod Genet (JARG)

Searches conducted: 2026 | Databases: MEDLINE (PubMed), Embase (Ovid), CENTRAL, Scopus, ClinicalTrials.gov, Google Scholar

This supplementary file presents the complete formalised search strategy used for this systematic review and meta-analysis. Three conceptual domains were combined with Boolean AND operators: (i) sperm-sorting and sex-selection methods; (ii) embryo or offspring sex distribution; and (iii) the assisted reproduction context. The tables below present: (A) the conceptual domain map with MeSH/Emtree terms and free-text keywords by domain; (B) the database-specific search strings as executed; and (C) the Boolean operator combinations by analytical target.

Abbreviations: PGT-A = preimplantation genetic testing for aneuploidy; PGT = preimplantation genetic testing; PGD = preimplantation genetic diagnosis; FISH = fluorescence in situ hybridisation; TE = trophectoderm; ICM = inner cell mass; AI = artificial intelligence; ML = machine learning; TLI = time-lapse imaging; ART = assisted reproductive technology; tiab = title/abstract field tag (PubMed); tw = text word (Ovid); MeSH = Medical Subject Headings; exp = exploded MeSH/Emtree term.

**Supplementary Table S1A — Conceptual Domain Map: MeSH / Emtree Terms and Free-text Keywords by Domain**

| **#** | **Conceptual Domain** | **Concept / Sub-topic** | **MeSH / Emtree Terms** | **Free-text Keywords** | **Extraction Notes** | **Database Applicability** |
| --- | --- | --- | --- | --- | --- | --- |
| **1** | **Domain A Pre-fertilisation (Sperm-level) Sex-enrichment** | Flow cytometry sperm sorting | "Sperm Sorting"[MeSH] "Flow Cytometry"[MeSH] "Sex Preselection"[MeSH] | sperm sort* OR "flow cytometry" OR MicroSort OR "sex selection" sperm | MicroSort® is the canonical trade name; include synonyms | MEDLINE, Embase, Scopus, CENTRAL |
|  |  | Density gradient centrifugation | "Centrifugation, Density Gradient"[MeSH] | "density gradient" AND sperm AND (sex OR male OR female) | Percoll/PureSperm gradients for sex enrichment only | MEDLINE, Embase, Scopus |
|  |  | Albumin gradient (Ericsson method) | "Albumins"[MeSH] OR "Centrifugation"[MeSH] | "albumin gradient" OR "Ericsson method" OR "swim-up" AND sex | Historical technique; mainly pre-2000 literature | MEDLINE, Embase |
|  |  | Novel / microfluidic sperm preparation | "Microfluidics"[MeSH] OR "Lab-On-A-Chip Devices"[MeSH] | microfluidic* AND sperm AND sex | Emerging; include if embryo sex outcome reported | MEDLINE, Embase, Scopus |
| **2** | **Domain B Post-fertilisation Morphological / Developmental Markers** | Trophectoderm (TE) grade | "Trophoblasts"[MeSH] OR "Blastocyst"[MeSH] | "trophectoderm" AND (grade OR morpholog*) AND (sex OR male OR female) | Gardner grading system most common; include all TE grading systems | MEDLINE, Embase, Scopus |
|  |  | Inner cell mass (ICM) grade | "Blastocyst Inner Cell Mass"[MeSH] | "inner cell mass" OR ICM AND (grade OR quality) AND (sex OR male OR female) | Often reported alongside TE grade | MEDLINE, Embase, Scopus |
|  |  | Blastulation day (Day 5 vs Day 6/7) | "Blastocyst"[MeSH] | ("day 5" OR "day 6" OR "day 7") AND blastocyst AND (sex OR sex ratio OR male embryo) | Critical comparator for secondary MA; denominator non-overlap required | MEDLINE, Embase, Scopus, CENTRAL |
|  |  | Cleavage speed / Day 2-3 cell number | "Cleavage Stage, Ovum"[MeSH] | "cleavage stage" OR "cell number" AND (day 2 OR day 3) AND (sex OR male OR female) | Less commonly reported; include if embryo sex confirmed by PGT | MEDLINE, Embase |
| **3** | **Domain C Post-fertilisation Morphokinetic / Time-lapse Parameters** | Time-lapse imaging / TLI | "Time-Lapse Imaging"[MeSH] | "time-lapse" AND (morphokineti* OR embryo) AND (sex OR male OR female) | Key TLI parameters: t2, t3, t4, t5, tB, cc2, s2 | MEDLINE, Embase, Scopus |
|  |  | Morphokinetic parameters (t2, tB, cc2, s2) | "Time-Lapse Imaging"[MeSH] OR "Embryo Culture Techniques"[MeSH] | morphokineti* AND (sex OR male OR female OR "sex ratio") AND embryo | Include all time-lapse-derived parameters | MEDLINE, Embase, Scopus |
| **4** | **Domain D Artificial Intelligence / Machine Learning Sex Prediction** | AI / ML embryo image analysis | "Artificial Intelligence"[MeSH] OR "Machine Learning"[MeSH] OR "Deep Learning"[MeSH] | (artificial intelligence OR machine learning OR deep learning OR neural network) AND embryo AND (sex OR male OR female) | Emerging field; verify embryo-level sex confirmation method | MEDLINE, Embase, Scopus |
| **5** | **Domain E Metabolomics / Spent Culture Medium** | Metabolomic sex prediction | "Metabolomics"[MeSH] OR "Culture Media"[MeSH] | metabolomic* AND (embryo OR "spent medium") AND (sex OR male OR female) | Non-invasive; few studies; include all if embryo-level confirmation | MEDLINE, Embase |
| **6** | **Domain F Sex Ratio / Primary Sex Ratio (Background)** | Embryo sex distribution | "Sex Ratio"[MeSH] OR "Embryo, Mammalian"[MeSH] | "sex ratio" AND (embryo OR blastocyst) AND (IVF OR ICSI OR "in vitro fertilization") | Primary MA background studies; must have extractable male/female counts | MEDLINE, Embase, Scopus, CENTRAL |
|  |  | Primary sex ratio in ART | "Reproductive Techniques, Assisted"[MeSH] OR "Fertilization in Vitro"[MeSH] | "primary sex ratio" OR "sex distribution" AND (IVF OR ICSI OR ART OR PGT) | Includes Orzack 2015 type studies | MEDLINE, Embase, Scopus |
| **7** | **Domain G Genetic Confirmation Methods** | PGT-A / PGT / PGS / NGS | "Genetic Testing"[MeSH] OR "Preimplantation Diagnosis"[MeSH] | (PGT-A OR PGT OR PGS OR "preimplantation genetic testing" OR "preimplantation genetic screening") AND (sex OR male OR female) | Only embryo-level confirmation eligible; birth sex excluded | MEDLINE, Embase, Scopus, CENTRAL |
|  |  | PGD / FISH on blastomeres | "Preimplantation Diagnosis"[MeSH] OR "In Situ Hybridization, Fluorescence"[MeSH] | (PGD OR "preimplantation genetic diagnosis" OR FISH) AND embryo AND (sex OR male OR female) | Legacy Day 3 method; eligible if embryo-level | MEDLINE, Embase |
| **8** | **Domain H Population : Family Balancing / Enriched Cohorts** | Family balancing / sex selection cohorts | "Sex Preselection"[MeSH] OR "Family"[MeSH] | "family balancing" OR "sex selection" OR "gender selection" AND (IVF OR ICSI OR embryo) | selection_bias_group = biased_population; flags Narvaez/Chang, Sindiani, Kirshenbaum | MEDLINE, Embase, Google Scholar |

Note: All MeSH terms were applied with explosion (exp) where applicable to capture narrower terms. Free-text terms were applied to title and abstract fields (tiab in PubMed; tw in Ovid Embase). Emtree equivalents were used in Embase. No date restriction was applied to any database. Human studies were filtered using database-specific validated filters.

**Supplementary Table S1B — Database-Specific Search Strings as Executed**

| **Database** | **Search #** | **Search String** | **Filters / Limits Applied** | **~Results** | **Date Searched** |
| --- | --- | --- | --- | --- | --- |
| **MEDLINE (via PubMed)** | **S1** | ("Sex Ratio"[MeSH] OR "Sex Preselection"[MeSH] OR "sperm sorting"[tiab] OR "sex selection"[tiab] OR "family balancing"[tiab]) AND ("Preimplantation Diagnosis"[MeSH] OR "Genetic Testing"[MeSH] OR PGT-A[tiab] OR PGT[tiab] OR PGS[tiab] OR "preimplantation genetic testing"[tiab] OR "preimplantation genetic screening"[tiab]) AND ("Fertilization in Vitro"[MeSH] OR "Sperm Injections, Intracytoplasmic"[MeSH] OR IVF[tiab] OR ICSI[tiab]) NOT (animals[MeSH] NOT humans[MeSH]) | No date restriction No language restriction Humans filter applied | ~210 | May 2026 |
| **MEDLINE (via PubMed)** | **S2** | ("embryo sex"[tiab] OR "male embryo"[tiab] OR "female embryo"[tiab] OR "embryo sex ratio"[tiab] OR "sex ratio" [tiab]) AND ("blastocyst"[MeSH] OR "trophectoderm"[tiab] OR "inner cell mass"[tiab] OR ICM[tiab] OR "blastulation"[tiab] OR "day 5"[tiab] OR "day 6"[tiab]) AND ("Fertilization in Vitro"[MeSH] OR "Sperm Injections, Intracytoplasmic"[MeSH]) | No date restriction Humans filter applied | ~95 | May 2026 |
| **MEDLINE (via PubMed)** | **S3** | ("time-lapse"[tiab] OR "morphokinetics"[tiab] OR "morphokinetic"[tiab] OR "artificial intelligence"[MeSH] OR "machine learning"[MeSH]) AND ("embryo sex"[tiab] OR "sex ratio"[tiab] OR "male embryo"[tiab] OR "female embryo"[tiab]) AND ("Fertilization in Vitro"[MeSH] OR ICSI[tiab]) | No date restriction Humans filter applied | ~40 | May 2026 |
| **MEDLINE (via PubMed)** | **S4 (Broad Search A)** | ((preimplantation genetic testing OR preimplantation genetic diagnosis OR preimplantation genetic screening OR PGT-A OR preimplantation genetic testing for aneuploidy) AND (euploidy OR euploid OR chromosomally normal embryo OR aneuploidy) AND (sex ratio OR embryo sex OR male embryo OR female embryo OR XY OR XX) AND (blastocyst* OR embryo* OR trophectoderm OR inner cell mass OR morphology OR morphokinetic* OR day 5 OR day 6 OR day 7 OR developmental speed)).tw. not (exp animals/ not exp humans/) | Replicated from Ovid MEDLINE strategy as per Search_A_Broad_nbib file No date restriction | ~272 | May 2026 |
| **Embase (via Ovid)** | **S5** | ((preimplantation genetic testing OR preimplantation genetic diagnosis OR preimplantation genetic screening OR PGT-A OR preimplantation genetic testing for aneuploidy) AND (euploidy OR euploid OR chromosomally normal embryo OR aneuploidy) AND (sex ratio OR embryo sex OR male embryo OR female embryo OR XY OR XX) AND (blastocyst* OR embryo* OR trophectoderm OR inner cell mass OR morphology OR morphokinetic* OR day 5 OR day 6 OR day 7 OR developmental speed)).tw. not (exp animals/ not exp humans/) | Run in Embase <1974 to 2026 May 04> Limit: humans No date restriction | 212 (Search 1) 255 (after human limit) | 04 May 2026 |
| **Embase (via Ovid)** | **S6** | (sperm sort* OR MicroSort OR "flow cytometry" OR "sex selection" sperm OR "family balancing" OR "gender selection").tw. AND (sex ratio OR embryo sex OR male embryo OR female embryo).tw. AND (IVF OR ICSI OR "in vitro fertilisation" OR "in vitro fertilization" OR "assisted reproduction").tw. NOT (exp animals/ NOT exp humans/) | Embase 1974–2026 Human limit applied | ~55 | May 2026 |
| **Embase (via Ovid)** | **S7 (Sperm Sorting – Search E)** | (sperm sort* OR MicroSort OR "flow cytometry sperm" OR sex-selected sperm OR albumin gradient OR Ericsson method OR density gradient AND sex).tw. AND (embryo sex OR sex ratio OR male embryo OR female embryo OR XY embryo OR XX embryo).tw. AND (IVF OR ICSI OR ART OR PGT OR PGD OR PGS).tw. | Embase 1974–2026 Human limit | ~40 | May 2026 |
| **CENTRAL (Cochrane)** | **S8** | ("sex ratio" OR "sex selection" OR "sperm sorting" OR "family balancing") AND ("preimplantation" OR "IVF" OR "ICSI") AND ("embryo" OR "blastocyst") | No date restriction No language restriction | ~35 | May 2026 |
| **Scopus** | **S9** | TITLE-ABS-KEY("embryo sex" OR "sex ratio" OR "sperm sorting" OR "family balancing") AND TITLE-ABS-KEY("PGT-A" OR "PGT" OR "PGS" OR "PGD" OR "preimplantation") AND TITLE-ABS-KEY("IVF" OR "ICSI" OR "blastocyst") AND NOT TITLE-ABS-KEY(animal OR mouse OR bovine OR murine) | No date restriction Humans inferred from context | ~130 | May 2026 |
| **ClinicalTrials .gov** | **S10** | "sex selection" OR "sperm sorting" OR "family balancing" AND "embryo" AND ("IVF" OR "ICSI") | All statuses No date restriction | ~20 | May 2026 |
| **Google Scholar (Grey lit.)** | **S11** | "sex ratio" "embryo" "IVF" "PGT-A" OR "PGT" filetype:pdf | First 20 pages Manual deduplication | ~200 | May 2026 |

Note: Search strings are presented verbatim or conceptually equivalent to those executed. Where minor field-tag adaptations were made for database syntax, these are noted in the Filters column. Approximate result counts reflect the deduplicated set imported into Rayyan (total ~148 records after deduplication). Results from grey literature (Google Scholar) were screened manually; only those with sufficient data for extraction were eligible for inclusion per PROSPERO-registered criteria.

**Supplementary Table S1C — Boolean Operator Combinations by Analytical Target**

| **Domain / Combination** | **Boolean Combination (Conceptual)** | **Purpose / Analytical Target** |
| --- | --- | --- |
| **Overall Combined (Primary)** | (Domain A: sperm-sorting) OR (Domain F: sex ratio) AND (Domain G: PGT/PGD/FISH confirmation) AND (IVF OR ICSI OR ART) | Primary MA studies: single-arm embryo sex-ratio cohorts with PGT-level confirmation |
| **Domain A vs Domain F (Comparative)** | (sperm sort* OR MicroSort OR flow cytometry OR albumin gradient OR density gradient AND sex) AND (embryo sex OR sex ratio OR male embryo OR female embryo) AND (IVF OR ICSI OR PGT) | Secondary MA: pre-fertilisation vs standard sperm preparation |
| **Domain B (TE/ICM grade)** | (trophectoderm OR inner cell mass OR ICM) AND (grade OR morpholog* OR quality) AND (sex OR male embryo OR female embryo OR sex ratio) AND (IVF OR ICSI OR PGT-A OR PGT) | Secondary MA: TE grade subgroup and ICM grade subgroup |
| **Domain B (Blastulation day)** | ("day 5" OR "day 6" OR "day 7" OR "blastulation day") AND (blastocyst OR embryo) AND (sex OR sex ratio OR male OR female) AND (PGT OR PGT-A OR IVF OR ICSI) | Secondary MA: Day 5 vs Day 6/7 (transfer-stage rebuild); denominator non-overlap required |
| **Domain C (Morphokinetics)** | (time-lapse OR morphokineti* OR t2 OR tB OR cc2 OR s2) AND (embryo sex OR male embryo OR female embryo OR sex ratio) AND (IVF OR ICSI) | Secondary MA: morphokinetic parameter subgroup |
| **Domain D (AI / ML)** | (artificial intelligence OR machine learning OR deep learning OR neural network OR AI model) AND (embryo sex OR sex prediction OR male embryo OR female embryo) AND (IVF OR ICSI OR PGT OR blastocyst) | Secondary MA: AI-based sex prediction accuracy subgroup (QUADAS-2 applicable) |
| **Domain E (Metabolomics)** | (metabolomic* OR spent medium OR culture medium conditioned) AND (embryo sex OR male embryo OR female embryo) AND (IVF OR ICSI) | Narrative / exploratory; small k expected |
| **Domain H (Family Balancing Sensitivity)** | (family balancing OR sex selection OR gender selection OR non-medical sex) AND (sperm OR embryo OR IVF OR ICSI OR PGT) AND (sex ratio OR male OR female) | Flags biased_population studies (Sindiani, Kirshenbaum, Narvaez/Chang); sensitivity exclusion planned |

Note: Boolean combinations shown are conceptual and were adapted to database-specific syntax during execution (see Table S1B). OR within a domain expands recall; AND between domains focuses precision. NOT operators were applied only for animal exclusion. All combination strategies were pre-specified in the PROSPERO protocol (CRD420261354601).
